# Supplementary material
Source: PubMed Central journal article supplement (PMC2082049)
Supplement: Supp_Fig2_Durand_SHANK3_Nat_Genet_2007.pdf [file Supp_Fig2_Durand_SHANK3_Nat_Genet_2007.pdf]

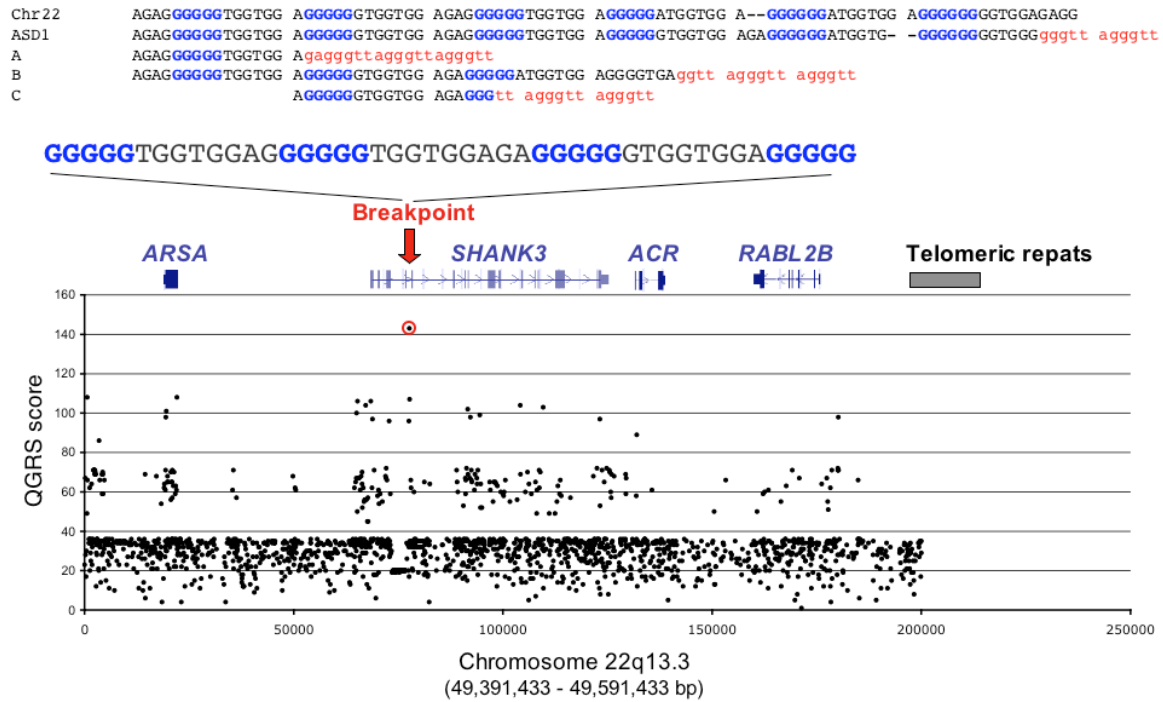

**Supplementary Figure 2.** Genomic sequence of the deletion breakpoint in family ASD 1 and prediction of quadruplex forming G-rich sequences (QGRS) at the terminal end of chromosome 22q13. The breakpoint identified in family ASD 1 is similar to those previously identified in probands A, B, C from Bonaglia *et al.*<sup>5</sup> The sequence surrounding the breakpoint is recognized as a QGRS and has the best prediction score (143, indicated by a red circle) out of the 1700 QGRS identified. This structure may represent a substrate for telomere formation, thereby increasing the risk of recurrent deletions in this region. Sequence was extracted from the Human March 2006 (hg18) assembly. Prediction was performed using the QGRS mapper software (<http://bioinformatics.ramapo.edu/QGRS/index.php>).
