# Supplementary material
Source: PubMed Central journal article supplement (PMC2082049)
Supplement: Supp_Table1_Durand_SHANK3_Nat_Genet_2007.pdf [file Supp_Table1_Durand_SHANK3_Nat_Genet_2007.pdf]

**Supplementary Table 1.** *SHANK3* variations identified in families with ASD and controls.

|                         | Variations                    |                     | Sex of proband                                    | Transmission and ethnicity                                                |               |                                                                                                                                                     | Additional family information | Occurrence     |                                   |
|-------------------------|-------------------------------|---------------------|---------------------------------------------------|---------------------------------------------------------------------------|---------------|-----------------------------------------------------------------------------------------------------------------------------------------------------|-------------------------------|----------------|-----------------------------------|
|                         | Exon                          | Change <sup>a</sup> |                                                   | Parents                                                                   | Siblings      | Ethnicity                                                                                                                                           |                               | ASD (n=227)    | Controls <sup>b</sup> (n=190-333) |
| <b>ASD</b>              |                               |                     |                                                   |                                                                           |               |                                                                                                                                                     |                               |                |                                   |
| E1                      | R12C                          | Male                | Mother                                            | Present in one unaffected brother and absent in one unaffected brother    | European      | The mother has social phobia traits; the father and the two brothers are healthy                                                                    | 1                             | 0              |                                   |
| E5                      | A198G                         | Female              | Mother                                            | Absent in the affected brother                                            | European      | No history of psychiatric disorders in either parent                                                                                                | 1                             | 0              |                                   |
| E8                      | R300C                         | Male                | Mother                                            | Absent in the unaffected sister                                           | Asian         | Language delay in the father; the mother is healthy                                                                                                 | 1                             | 0 <sup>c</sup> |                                   |
| E21a                    | G1011V                        | Female              | Mother                                            | (3 brothers, DNA not available)                                           | European      | No history of psychiatric disorders in any family member                                                                                            | 2                             | 0              |                                   |
| E21a                    | G1011V                        | Male                | Father                                            | Present in the affected monozygotic twin                                  | European      | No history of psychiatric disorders in either parent                                                                                                |                               |                |                                   |
| E21a                    | R1066L                        | Male                | Mother                                            | Present in the unaffected sister                                          | North African | The father has a depressive syndrome; the mother had depression during pregnancy                                                                    | 1                             | 0              |                                   |
| E21a                    | ins(G)3680 at amino acid 1227 | Male                | <i>De novo</i> (germinal mosaicism in the mother) | Present in the two affected brothers and absent in the unaffected brother | European      | No history of psychiatric disorders in either parent                                                                                                | 1                             | 0              |                                   |
| E21a                    | R1231H                        | Female              | Mother                                            | Absent in the affected brother                                            | European      | No history of psychiatric disorders in either parent                                                                                                | 1                             | 0              |                                   |
| E22b                    | S1566G                        | Male                | Father                                            | (2 unaffected siblings, DNA not available)                                | European      | No history of psychiatric disorders in any family member                                                                                            | 1                             | 0              |                                   |
| <b>ASD and Controls</b> |                               |                     |                                                   |                                                                           |               |                                                                                                                                                     |                               |                |                                   |
| E21a                    | A963G                         | Female              | Mother                                            | (1 healthy brother, DNA not available)                                    | European      | No history of psychiatric disorders in any family member                                                                                            | 2                             | 1              |                                   |
| E21a                    | A963G                         | Male                | Father                                            | (1 brother, DNA not available)                                            | European      | The father has broad autism phenotype (very shy, some autistic traits); the younger brother has mental retardation and autistic traits (not autism) |                               |                |                                   |
| E22c                    | P1654T                        | Male                | Father                                            | Absent in the affected brother                                            | European      | The father talked late and has stereotyped body movements; the mother also was late to talk.                                                        | 2                             | 1              |                                   |
| E22c                    | P1654T                        | Male                | Nd                                                | (1 sister, DNA not available)                                             | European      | No history of psychiatric disorders in either parent or the sister                                                                                  |                               |                |                                   |
| <b>Controls</b>         |                               |                     |                                                   |                                                                           |               |                                                                                                                                                     |                               |                |                                   |
| E6                      | A224T                         | Female              | —                                                 | —                                                                         | European      |                                                                                                                                                     | 0                             | 1              |                                   |
| E21a                    | V1333G                        | Male                | —                                                 | —                                                                         | European      |                                                                                                                                                     | 0                             | 2              |                                   |

<sup>a</sup> *SHANK3* cDNA sequence: NM\_033517.1. <sup>b</sup> Exon 8 was sequenced in 333 controls; exons 1, 4-7, 10, 12, 18-20, 21a, and 22abc were sequenced in 270 controls; and exons 2, 3, 9, 11, and 13-17 were sequenced in 190 controls. Nd = not determined.
