# Supplementary material
Source: PubMed Central journal article supplement (PMC2082049)
Supplement: Supp_Table2_Durand_SHANK3_Nat_Genet_2007.pdf [file Supp_Table2_Durand_SHANK3_Nat_Genet_2007.pdf]

**Supplementary Table 2. Primers used in this study**

| <b>Primers for mutation screening</b>          |                                      |                               |                                       |                     |                      |
|------------------------------------------------|--------------------------------------|-------------------------------|---------------------------------------|---------------------|----------------------|
| <b>Forward primer (5'-3')</b>                  |                                      | <b>Reverse Primer (5'-3')</b> |                                       | <b>Size (bp)</b>    | <b>Condition</b>     |
| SHANK3E1F                                      | GCGCTCCGTTCCCGGCGCGA                 | SHANK3E1R                     | CCTCCGCGAACC CGGCGCGAA                | 325                 | 70°C + GC melt 10%   |
| SHANK3E2F                                      | GACCTGAGCTCACGAGCCCGCT               | SHANK3E2R                     | CTGCCGTGCCCTTCACTGGTC                 | 322                 | 55°C                 |
| SHANK3E3F                                      | TCCACTGTGGTAGTATGACTG                | SHANK3E3R                     | TGGAACACATCACTGTACCAC                 | 435                 | 57°C                 |
| SHANK3E4F                                      | GAGGAAGCGGGTGATGTTCA                 | SHANK3E7R                     | AGTATATCCACTCGGTGCA                   | 1047                | TD 66–56°C           |
| SHANK3E8F                                      | GTGTGCATTCCTGTGTGCGCA                | SHANK3E8R                     | GGCTTCTGCACCCCTGCTGGT                 | 485                 | TD 66–56°C           |
| SHANK3E9F                                      | ATCCCAGTTACAGACAAGAGT                | SHANK3E9R                     | CAATGTTCACTCAACACAGGC                 | 450                 | 55°C                 |
| SHANK3E10F                                     | GCCTGGGCAAACCTGGACAAGT               | SHANK3E10R                    | TCCCCAACAGGAAGCCCTAG                  | 500                 | 55°C                 |
| SHANK3E11F                                     | GGCATCGCGTCCGTCACCTACGT              | SHANK3E11R                    | AAGGTTCTGCGGTGCGGGT                   | 415                 | 55°C + GC melt 10%   |
| SHANK3E12F                                     | AGCTGGGAGAAAAGTGGGAAGG               | SHANK3E12R                    | GTCACACACGTCCTATGTGTC                 | 500                 | TD 65–55°C           |
| SHANK3E13F                                     | ACTGGTGACCAGCATGGGTGA                | SHANK3E14R                    | GGCAGAAGCAAGAAGCTGAAG                 | 560                 | TD 65–55°C           |
| SHANK3E15F                                     | CGCAGTCATCTCTTCTCTGTG                | SHANK3E16R                    | GGCAGAAGCAAGAAGCTGAAG                 | 589                 | 55°C                 |
| SHANK3E17F                                     | ACCTGAACAAGATCCTGGCAC                | SHANK3E17R                    | CACCCATTCACCTCTGACCTG                 | 390                 | 55°C                 |
| SHANK3E18F                                     | GCATGTACCAACTGACTCCAG                | SHANK3E18R                    | CCATCACAGTCTCAGAGGGTC                 | 500                 | 55°C                 |
| SHANK3E19F                                     | CTCTGTGTCAGCATCACGGGTG               | SHANK3E20R                    | CTTCAAACCAAGTCCACCCT                  | 1010                | 61°C                 |
| SHANK3E21AF1                                   | AAGGCTGGCTCTGTGGGAGG                 | SHANK3E21AR1                  | ACGGACAGGAACACAGTGGAG                 | 825                 | TD 70–60°C + DMSO 5% |
| SHANK3E21AF2                                   | CAAGAGCCCCCTGGTGAAGCA                | SHANK3E21AR2                  | GCTCTCGGGCAGCCAGGGCAA                 | 300                 | TD 70–60°C + DMSO 5% |
| SHANK3E21AF3                                   | TGCCCTGAAGCCGTTGGTCAG                | SHANK3E21AR3                  | ACCTTCTCTGCCTCCCTGCGA                 | 300                 | 58°C                 |
| SHANK3E21AF4                                   | CCTGTTTGTGGATGTACAGGCC               | SHANK3E21AR4                  | ACCGTGGAGATGGTGCCTGTG                 | 716                 | 55°C + GC melt       |
| SHANK3E21AF5                                   | CTCAGGGAAGCCAGCAGTGA                 | SHANK3E21AR5                  | AGAACAGACAAGAGGAATGAC                 | 668                 | TD 70–60°C           |
| SHANK3E21BF                                    | GAGGAGCCCTTCGGGCCCGTG                | SHANK3E21BR                   | GGCAGAGAAGAGCGGAGGGAG                 | 641                 | TD 70–60°C           |
| SHANK3E21CF                                    | GTCTCGAAGGAAACATGAAC                 | SHANK3E21CR                   | CAGTGTCCATGTCTGACTTCC                 | 431                 | 55°C                 |
| SHANK3E22F1                                    | CCGTAGGATCCCACCCTTTA                 | SHANK3E22R1                   | GCCTAGGTGGATGCTCTCCAG                 | 500                 | 60°C                 |
| SHANK3E22F2                                    | CTTCTGGTGCAGCGGTGAG                  | SHANK3E22R2                   | ACAGCAAACAGGACGATTCA                  | 485                 | TD 65–55°C + DMSO 5% |
| <b>Primers for expression</b>                  |                                      |                               |                                       |                     |                      |
| <b>Forward primer (5'-3')</b>                  |                                      | <b>Reverse Primer (5'-3')</b> |                                       | <b>Size (bp)</b>    | <b>Condition</b>     |
| SHANK3EX18F                                    | CTGCGCTCCAAGTCCATGACA                | SHANK3EX18R                   | GGCCCTGGCGTTCAAACAATG                 | 219,<br>198         | 55°C                 |
| SHANK3EX21F                                    | GCCTGAAGACGACAAACCAA                 | SHANK3EX21R                   | GAGCTGCAGCGGCTTCTGCTG                 | 571,<br>403,<br>321 | TD 70–60°C + DMSO 5% |
| <b>Primers for <i>in vitro</i> mutagenesis</b> |                                      |                               |                                       |                     |                      |
| <b>Forward primer (5'-3')</b>                  |                                      | <b>Reverse Primer (5'-3')</b> |                                       |                     |                      |
| SHANK3R12CF                                    | GGGCCAGCGCGTGGTGTGCGTCGGCATCCCCGAC   | SHANK3R12CR                   | TCCGGGATGCCGACGCACACGACCACGGCGCTGGCCC |                     |                      |
| SHANK3R30CF                                    | ACCAGGAGAGCTGTGCCTGCGTCTGCTTTTCCGTGG | SHANK3R30CR                   | CCACGAAAAGCAGGACGCAGGCACAGCTCTCCTGGT  |                     |                      |
| SHANK3INSF                                     | GAGCCCAACAGGCTGGGGGGCTGAAGAGGAGCGCC  | SHANK3INSR                    | GGCGCTCCTCTTACAGCCCCCAGCCTGTTGGGCTC   |                     |                      |
| <b>Primers for telomere-SHANK3 PCR</b>         |                                      |                               |                                       |                     |                      |
| <b>Forward primer (5'-3')</b>                  |                                      | <b>Reverse Primer (5'-3')</b> |                                       |                     |                      |
| BP22QF                                         | GTGACTTGACTTCTCTGAACCTTGG            | BP22QR                        | TATGGATCCCTAACCCCTAACCCCTAACCC        |                     |                      |
| <b>Primers for quantitative PCR</b>            |                                      |                               |                                       |                     |                      |
| <b>Forward primer (5'-3')</b>                  |                                      | <b>Reverse Primer (5'-3')</b> |                                       |                     |                      |
| SHANK3E9F-FAM                                  | mATCCCAGTTACAGACAAGAGT               | SHANK3E9R                     | CAATGTTCACTCAACACAGGC                 |                     |                      |
| SHANK3E17F-FAM                                 | mACCTGAACAAGATCCTGGCAC               | SHANK3E17R                    | CACCCATTCACCTCTGACCTG                 |                     |                      |
| NLGN1F-FAM                                     | mCCTTGATTAATACAGGCTTCA               | NLGN1R                        | ATACAGAGCATCACATACTAC                 |                     |                      |
| ANKRD15F-FAM                                   | mGAAGAACTAACGACCCTTG                 | ANKRD15R                      | TCTCTGAGATGAGTCAACAAC                 |                     |                      |
